# Supplementary material
Source: bioRxiv or medRxiv preprint supplement (https://www.biorxiv.org/highwire/filestream/96629/field_highwire_adjunct_files/15/314922-9.pdf)

**a**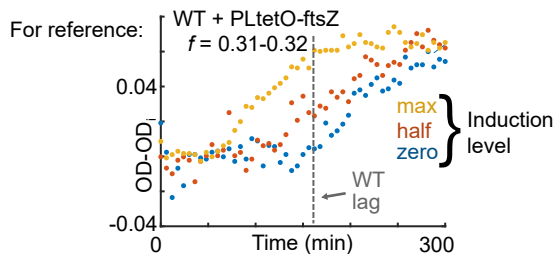**b**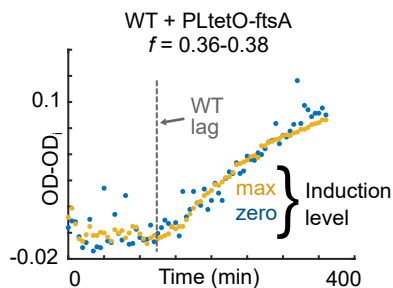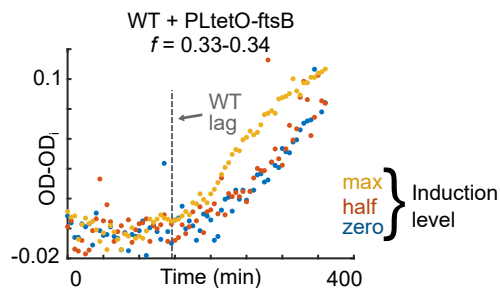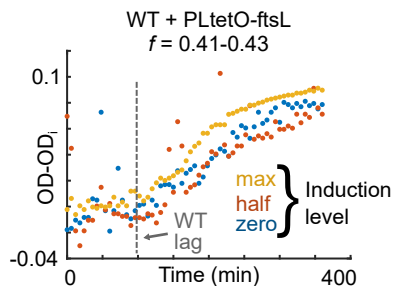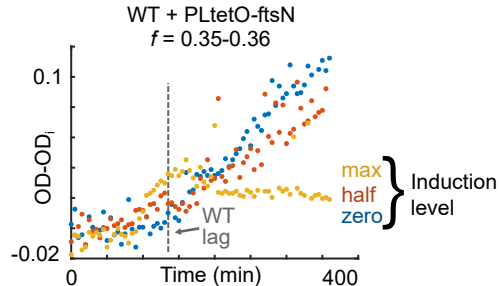

Supplement: Supplementary file [file 314922-9.pdf]
